## Correction to 'Solution structures and effects of a platinum compound successively bound MYC G-quadruplex'

This is a correction to: Wenting Liu, Bo-Chen Zhu, Liu-Yi Liu, Xiao- Yu Xia, Jinho Jang, Jonathan Dickerhoff, Danzhou Yang, Zong-Wan Mao, Solution structures and effects of a platinum compound successively bound MYC G-quadruplex, *Nucleic Acids Research*, Volume 52, Issue 16, 9 September 2024, Pages 9397–9406, <https://doi.org/10.1093/nar/gkae649>

The following change has been made to the originally published manuscript. The following text has been added to the beginning of the **Funding** section in the article: “This research was supported by the National Institutes of Health R01CA177585 (D.Y.), U01CA240346 (D.Y.), and P30CA023168 (Purdue Center for Cancer Research).”
